## RESEARCH ARTICLE

# Predicting poor outcomes in children aged 1–12 with respiratory tract infections: A systematic review

George Edwards<sup>1\*</sup>, Louise Newbould<sup>2</sup>, Charlotte Nesbitt<sup>1</sup>, Miranda Rogers<sup>1</sup>, Rebecca L. Morris<sup>3</sup>, Alastair D. Hay<sup>4</sup>, Stephen M. Campbell<sup>3</sup>, Gail Hayward<sup>1</sup>

**1** Nuffield Department of Primary Care Health Sciences, University of Oxford, Oxford, United Kingdom, **2** Social Policy Research Unit, University of York, York, United Kingdom, **3** Division of Population Health, NIHR Greater Manchester Patient Safety Translational Research Centre, School of Health Sciences, University of Manchester, Manchester, United Kingdom, **4** Centre for Academic Primary Care, Bristol Medical School: Population Health Sciences, University of Bristol, Bristol, United Kingdom

\* [george.edwards@phc.ox.ac.uk](mailto:george.edwards@phc.ox.ac.uk)

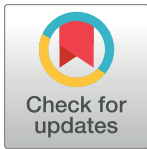

## Abstract

### Background

Demand for NHS services is high and rising. In children respiratory tract infections (RTI) are the most common reason for consultation with primary care. Understanding which features are associated with good and poor prognosis with RTI will help develop interventions to support parents manage illness.

### Aim

To identify symptoms, signs, and investigation results associated with good and poor prognosis, and clinical decision making in children aged 1–12 years with RTI symptoms, at home and presenting to ambulatory care.

### Design and setting

Systematic literature review.

### Methods

We searched MEDLINE, EMBASE, Cinahl, Web of Science and the Cochrane database of systematic reviews for studies of children aged 1 to 12 years with a RTI or related condition reporting symptoms, signs and investigation results associated with prognostic outcomes. Quality was assessed using the QUIPS tool.

### Results

We included 27 studies which included 34802 children and measured 192 factors. Nine studies explored future outcomes and the remainder explored clinical management from the initial consultation with the health services. None were conducted in a home setting.

## OPEN ACCESS

**Citation:** Edwards G, Newbould L, Nesbitt C, Rogers M, Morris RL, Hay AD, et al. (2021) Predicting poor outcomes in children aged 1–12 with respiratory tract infections: A systematic review. PLoS ONE 16(4): e0249533. <https://doi.org/10.1371/journal.pone.0249533>

**Editor:** Sophie Yamine, University of Children's Hospital of Bern, SWITZERLAND

**Received:** August 26, 2020

**Accepted:** March 22, 2021

**Published:** April 19, 2021

**Copyright:** © 2021 Edwards et al. This is an open access article distributed under the terms of the [Creative Commons Attribution License](https://creativecommons.org/licenses/by/4.0/), which permits unrestricted use, distribution, and reproduction in any medium, provided the original author and source are credited.

**Data Availability Statement:** All relevant data are within the manuscript and its [Supporting Information](#) files.

**Funding:** This work was funded by an NIHR School of Primary Care Research (<https://www.spcr.nihr.ac.uk/>) grant awarded to SC (number 417), the NIHR Greater Manchester Patient Safety Translational Research Centre, and by the National Institute for Health Research (NIHR) Community Healthcare MedTech and In Vitro Diagnostics Co-operative at Oxford Health NHS Foundation Trust.

The views expressed are those of the author(s) and not necessarily those of the NHS, the NIHR or the Department of Health and Social Care.

**Competing interests:** The authors have declared that no competing interests exist.

**Abbreviations:** NHS, National Health Service; ED, emergency department; RTI, respiratory tract infection; GP, general practitioner; CARIFS, Canadian Acute Respiratory Illness and Flu Scale.

Respiratory signs, vomiting, fever, dehydration and tachycardia at the initial contact were associated with future hospitalisation. Little evidence was available for other outcomes.

## Conclusion

Some evidence is available to clinicians to stratify risk of, future hospitalisation, but not of other prognostic outcomes. There is little evidence available to parents to identify children at risk of poor prognosis. Research is needed into whether poor prognosis can be predicted by parents in the home.

## Introduction

Use of the National Health Service (NHS) is high and rising [1, 2]. Respiratory tract infection (RTI) is a common illness amongst children under the age of 12 [3] and is the most common paediatric presentation managed by primary care clinicians [4, 5]. Most RTIs are self-limiting illnesses, albeit with longer courses than expected by both clinicians and parents [6–8], and are rarely serious enough to require hospital admission [9]. Despite this, they can be a significant cause of anxiety for parents [10].

There is uncertainty from both parents and clinicians about how to identify children with RTIs who are at risk of poor prognosis [11]. Parents often take their children to visit the health services due to uncertainty about their condition [12, 13] and to ‘rule out’ a potential health threat [13] which they may be unable to recognise themselves [14]. Clinicians express similar concerns in predicting prognosis of intermediate severity RTIs [15] and may prescribe antibiotics to mitigate deterioration in these cases. Antibiotic prescription is a common outcome from RTI consultations [16, 17] and more than 60% of all inappropriate antibiotic prescriptions issued in primary care are for RTI and ear, nose and throat conditions including sore throat and cough [18]. This can lead to antibiotic resistance [19].

One approach to reducing demand for consultations amongst children with RTIs is to develop guidance for parents on when it is most appropriate to care for children at home or visit a pharmacy and when to seek healthcare advice for paediatric RTI. A systematic review found that a patient education programmes which engage parents and children may reduce consulting rates by 13–40% [20]. However, the evidence for predicting prognosis in paediatric RTI is unclear. Therefore we aimed to systematically review the literature on the association between symptoms, signs, and investigations and clinical decision making and risk of poor future outcomes in children aged between 1 and 12.

## Methods

Our review protocol was registered with PROSPERO: CRD42019122487

## Search

We developed a search strategy using an iterative process based on recommendations from an information specialist. We searched Medline, Embase, Cinahl, Cochrane database of systematic reviews, and the Web of Science for studies with key words in four main themes: the age of the target patients, the conditions of interest, target settings, and key outcomes (see S1 Table in [S1 File](#) for Medline search terms). We limited the search to studies in English. The search was carried out on the 23<sup>rd</sup> January 2019 and was re-run on 10<sup>th</sup> August 2020.

## Eligibility

**Participants.** Children between the ages of 1 and 12 (inclusive). We excluded studies including only children younger than one as it was considered that a GP would be more likely to offer an assessment to this age group. Studies of children over the age of 12 only were not included as children beyond this age have a greater role in deciding whether to consult. We excluded studies of children with comorbidities other than obesity and asthma.

**Conditions.** Undifferentiated RTI, common cold, influenza, cough ( $\leq 28$  days), respiratory wheeze, breathing difficulties, otitis media, ear ache, croup, bronchiolitis, and pneumonia. We excluded studies of asthma, malaria, cystic fibrosis, tuberculosis, acute cough lasting longer than 28 days, and any infectious agent not related to the respiratory tract.

**Prognostic factors.** Symptoms, clinical signs, and investigation results available to primary care. We classified symptoms as anything apparent to parents (or older children), such as cough, and clinical signs as evidence available to clinicians on physical examination, such as crackles on auscultation. We included investigation results if they were potentially available to primary care clinicians, such as point-of-care tests or oxygen saturation tests. We excluded studies investigating the prognostic value of clinical prediction rules unless results were reported separately for individual factors.

**Outcomes.** To account for poor outcomes we include five measures of poor prognosis: death, hospitalisation, antibiotic prescriptions, prolonged or deteriorating symptoms, and re-consultation, and two clinical decisions: immediate hospitalisation and antibiotic prescription. We excluded studies which did not report any of these outcomes.

**Settings.** Primary care, ambulatory care, emergency department, and the home setting. We excluded any study not defined as a World Bank high income country [21] as the disease spectrum is likely to be different.

**Type of study.** Prospective or retrospective cohort, case-control, cross-sectional studies, and systematic reviews. We excluded all other study types.

## Selection of studies

The Cochrane Collaboration Covidence platform was used for study screening. Two authors (GE, LN, MR, or CN) screened each study according to pre specified inclusion and exclusion criteria and we resolved disagreements by discussion with a third reviewer (GH). We screened titles and abstracts initially and obtained full texts for potentially relevant studies. We hand searched reference lists of all included studies and relevant systematic reviews for included studies.

## Data extraction

For each included study, two authors (GE, LN, MR, CN, or RM) performed data extraction independently using a standardised and piloted data extraction form. We extracted general study information, study characteristics, participants, prognostic factors and outcome measures, analysis techniques, and results. We extracted multivariate odds ratios as a measure of the effect size where possible.

## Risk of bias assessment

For each included study, two authors (GE, LN, MR, CN, or RM) assessed the risk of bias using the QUIPS tool [22]. One author (GE) checked for consistency across all studies.

## Analysis

Due to study heterogeneity we were unable to perform meta-analyses and have reported outcomes narratively.

## Results

### Summary of included studies

The database search identified 7106 articles (Fig 1). Of these we selected 216 for a full text review and included 27. These studies included 34221 children and analysed 192 different prognostic factors.

Studies included unselected children with RTI ( $n = 11$ ), and children with clinical diagnoses of bronchiolitis (6), influenza (5), acute otitis media (1), community acquired pneumonia (2), croup (1), and peritonsillar abscess (1). Seven studies were performed in the UK, four in the USA, four did not specify, and one was conducted in 12 different countries. The remaining studies were conducted in 12 different high income countries.

There were no studies conducted in a home setting. Settings included: emergency department (16), primary care (7), hospital inpatient ward (2), mixed settings (1), and ambulatory care (1). Study outcomes were death (3), future hospitalisation (2), prolonged symptoms (3), re-consultation (2), future antibiotic prescription (1), hospitalisation from the initial consultation (15), and antibiotic prescription at the initial consultation (6). Full characteristics of included studies are detailed in Table 1.

### Risk of bias of included studies

Full QUIPS assessment is available in Table 2. We found a high risk of confounding in 9/27 studies with 11/27 at moderate risk. Nine of the studies had a retrospective design which makes controlling for confounding variables, such as other relevant signs and symptoms, challenging. However, even in the prospective studies there was limited reporting or discussion of potential confounding variables.

In 11/27 studies we found a moderate risk of bias in prognostic factor measurement with 1 study at high risk. Key issues were poor reporting of the method of recording and measurement of prognostic factors and a lack of pre-specification of cut offs for continuous variables (e.g. fever) [7, 35, 39]

A final concern related to statistical reporting and analysis. We found a moderate risk of bias in 6/27 studies and a high risk of bias in 2/27. Key issues arising in this domain were a lack of available data to assess the adequacy of the analysis [40, 45] and a lack of justification for the statistical methods and models used [30].

### Factors associated with poor or good prognosis

192 different prognostic factors were explored (see S2 Table in S1 File for full details of prognostic factors in each study). Each study measured prognostic factors in one cross-section; no studies measured prognostic factors at multiple time points.

Study outcomes are reported in two groups: prognostic (death, future hospitalisation or antibiotic prescription, prolonged symptoms, and re-consultation), and clinical decision making (immediate hospitalisation or antibiotic prescription).

**Prognostic.** *Death.* Three studies, including 497 patients with suspected [27] or laboratory confirmed [25, 26] influenza, reported on deaths. Only one study analysed the predictive value of patient features; no patient signs, symptoms, or investigation results were associated with

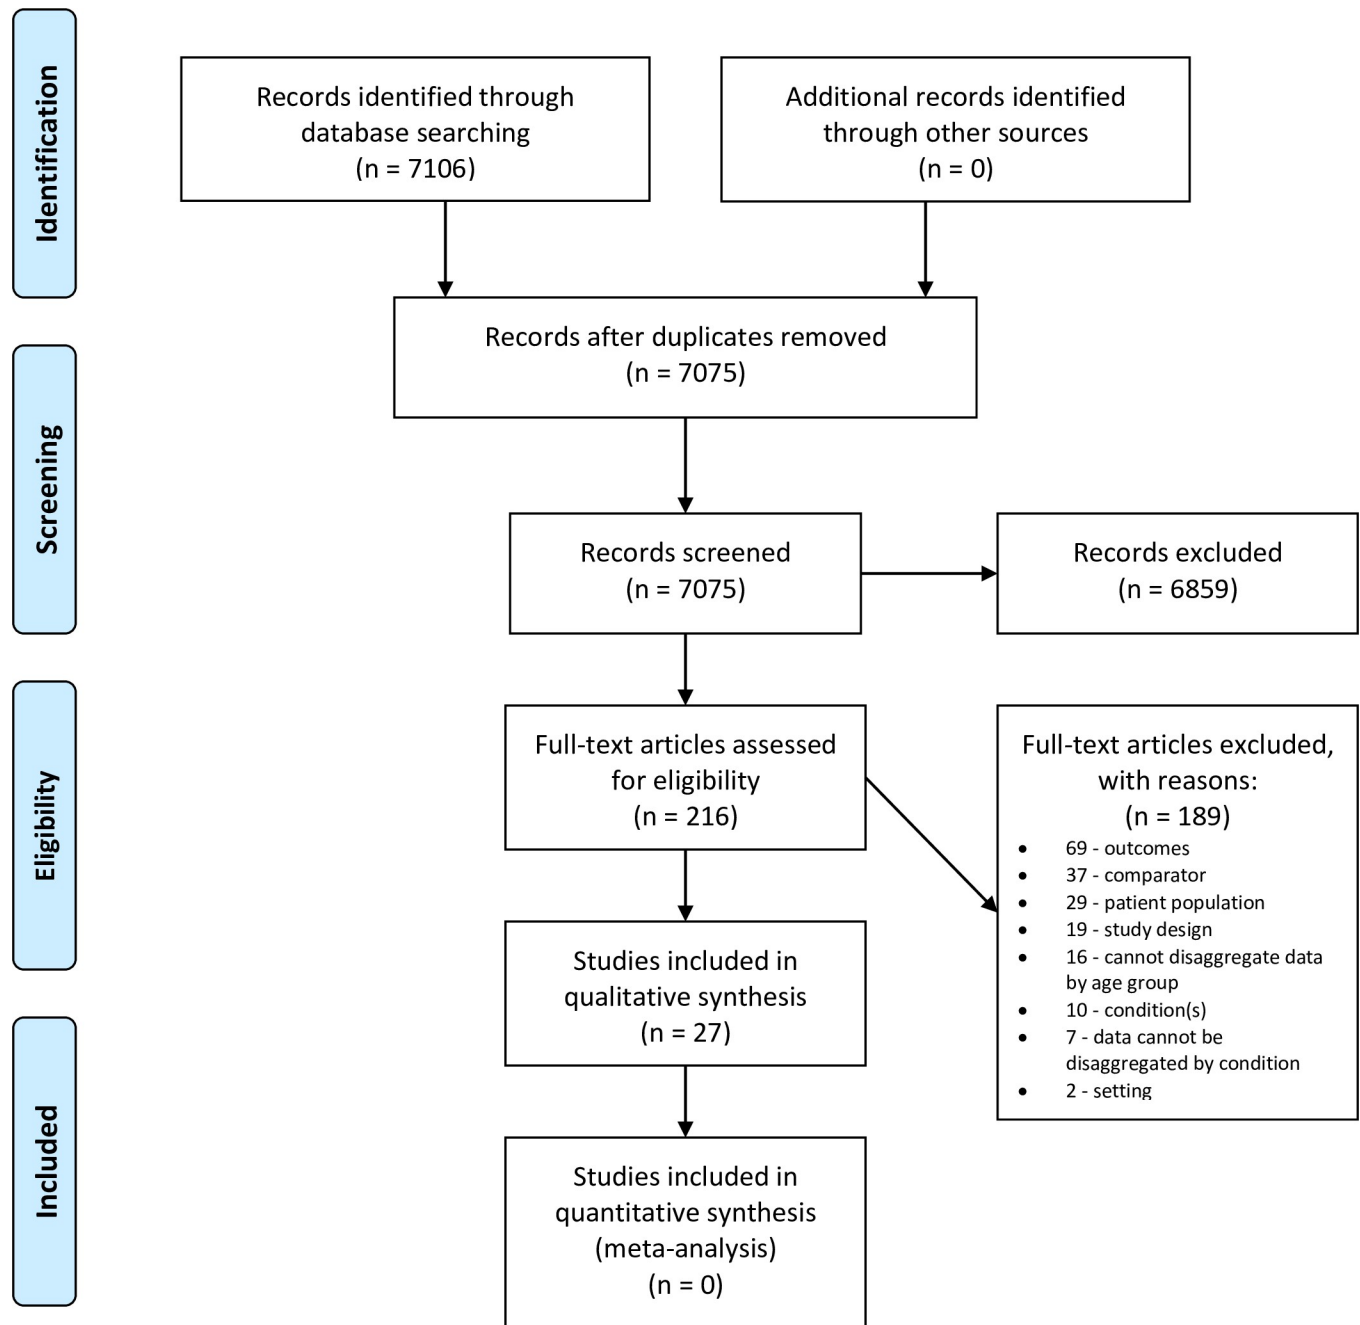

Fig 1. PRISMA flow diagram.

<https://doi.org/10.1371/journal.pone.0249533.g001>

death [25]. One study did not observe any deaths [26], and the final study lacked sufficient data for analysis [27].

*Hospitalisation within 30 days.* One study investigated the association of symptoms, signs and investigations with hospitalisation within 30 days from initial contact with primary care for acute cough or respiratory tract infection in 8394 children aged 3 months to 16 years [9]. Of 40 relevant prognostic factors analysed, four were associated with hospitalisation within 30 days of the initial consultation after multivariate analysis: moderate-to-severe vomiting (2.56

Table 1. Included study summary.

| Study                | Population (n, mean or median age in years, IQR or SD of age in years % under 1% over 12)* | Presenting Condition                                                | Study design                                        | Country                | Setting                                              | Primary outcome                                                                                               | Additional Outcomes                                                   |
|----------------------|--------------------------------------------------------------------------------------------|---------------------------------------------------------------------|-----------------------------------------------------|------------------------|------------------------------------------------------|---------------------------------------------------------------------------------------------------------------|-----------------------------------------------------------------------|
| Ambroggio 2018 [23]  | n = 3016,<br>median 3.0,<br>IQR 1.7,                                                       | Community acquired pneumonia                                        | Retrospective cohort study                          | Not specified          | ED                                                   | Pneumonia-related ED revisit (within 48 hours or 30 days)                                                     | Hospital admission within 30 days with a diagnosis code for pneumonia |
| Butler 2005 [7]      | n = 240<br>mean 5.2 years<br>standard deviation (SD) 3.39<br>All <12 years                 | Probable viral acute upper respiratory tract illness                | Secondary analysis of a randomised controlled trial | UK                     | Situation of usual care                              | Variables associated with scores on the Canadian Respiratory Illness and Flu Scale (CARFIS [24]) after 7 days | Re-consultation; Antibiotic prescription after 7 days                 |
| Dalziel 2013 [25]    | n = 265 cases<br>mean 6.6 years<br>SD 4.7                                                  | Influenza like illness                                              | Retrospective case-control                          | 12 different countries | ED                                                   | Hospitalisation to intensive care for assisted ventilation and/or inotropic/vasopressor support               | Death                                                                 |
| Dubnov-Raz 2011 [26] | n = 73<br>mean 8.9 years<br>SD 5.2                                                         | Laboratory confirmed H1N1 Influenza                                 | Prospective cohort study                            | Israel                 | Tertiary care hospital                               | Hospitalisation for at least 24 hours                                                                         | Death                                                                 |
| Hay 2003 [6]         | n = 256<br>median 2<br>interquartile range (IQR) 6.8–35.0<br>All <12 years                 | Cough ≤28 days                                                      | Prospective cohort study                            | UK                     | Primary Care                                         | Cough duration                                                                                                |                                                                       |
| Hay 2016 [9]         | n = 8394<br>median 3<br>IQR 1–6                                                            | Cough ≤28 days and other respiratory tract infection (RTI) symptoms | Prospective cohort study                            | UK                     | Primary Care                                         | Hospital admission for RTI within 30 days                                                                     |                                                                       |
| Venkatesan 2015 [27] | n = 159 (target population 0–16 years)                                                     | Influenza like illness                                              | Open cohort study—30 day follow up                  | UK                     | Primary Care                                         | Hospital admission within 24 hours of assessment in general practice                                          | Death within 30 days; Antibiotic prescription                         |
| Walsh 2004 [28]      | n = 132<br>mean 6.1 months<br>(range 0.27–21.9 months)                                     | Bronchiolitis                                                       | Retrospective chart review                          | Ireland                | ED                                                   | Hospitalisation within 24 hours of initial consultation                                                       |                                                                       |
| Wensaas 2018 [29]    | n = 2398<br>mean 4.1 years                                                                 | Acute cough ≤28 days and other RTI symptoms                         | Prospective cohort study                            | UK                     | Primary Care                                         | Prediction of one of five symptom trajectories                                                                |                                                                       |
| Yang 2017 [30]       | n = 196<br>mean 2.1 years<br>SD 1.8<br>19.8% aged <1                                       | Croup                                                               | Prospective cohort study                            | Taiwan                 | Paediatric ED                                        | Admission to paediatric observation unit, in-patient ward, or ICU                                             | Re-consultation                                                       |
| Ahmed 2010 [31]      | n = 6134 (target range 0–18)                                                               | Respiratory Illness                                                 | Retrospective cross-sectional chart review          | Not specified          | Family practitioner office, paediatrician office, ED | Antibiotic prescription at the initial contact                                                                |                                                                       |
| Alzaharani 2018 [32] | n = 4013 (target range 6 months to 18 years)                                               | Upper Respiratory Infection                                         | Cross sectional study of publically available data  | Not specified          | Ambulatory Care                                      | Broad spectrum prescription at the initial contact                                                            |                                                                       |

(Continued)

Table 1. (Continued)

| Study                      | Population (n, mean or median age in years, IQR or SD of age in years % under 1% over 12)* | Presenting Condition                | Study design                                        | Country       | Setting                     | Primary outcome                                                                                                                                                                                          | Additional Outcomes                                    |
|----------------------------|--------------------------------------------------------------------------------------------|-------------------------------------|-----------------------------------------------------|---------------|-----------------------------|----------------------------------------------------------------------------------------------------------------------------------------------------------------------------------------------------------|--------------------------------------------------------|
| Bender 2009 [33]           | n = 1230 (target range 0–18)                                                               | Laboratory confirmed influenza      | Retrospective cohort study                          | USA           | ED                          | Admission to the paediatric ward, a 24-hour observation unit, or intensive care at the initial contact.                                                                                                  |                                                        |
| Blacklock 2011 [34]        | n = 700<br>mean 3.5 years<br>SD 3.2<br>20.2%<br>All <12 years                              | Suspected acute infection           | Prospective diagnostic cohort study                 | UK            | Paediatric Assessment Unit  | Serious respiratory infection' (consolidation on chest x-ray, clinical diagnosis of lower RTI, or RTI requiring hospitalisation and one inpatient treatment),                                            | Other foci of serious infection; Minor or no infection |
| Brown 2003 [35]            | n = 679<br>median 7 months<br>IQR 4–11 months<br>All <12 years                             | Bronchiolitis                       | Retrospective chart review                          | Not specified | ED                          | Hospitalisation through the ED at the initial contact with a ED diagnosis consistent with bronchiolitis and a hospital discharge of bronchiolitis                                                        |                                                        |
| Ciofi Degli Atti 2006 [36] | n = 2151<br>mean 4.2 years                                                                 | Respiratory tract infections        | Cross sectional survey                              | Italy         | Primary Care                | Antibiotic prescription at the initial contact                                                                                                                                                           |                                                        |
| Florin 2020 [37]           | n = 477<br>mean 5.6<br>SD 4.6                                                              | Community-acquired pneumonia        | Prospective cohort study                            | USA           | ED                          | Hospitalisation at initial consultation or within 7 days                                                                                                                                                 |                                                        |
| Garcia 2015 [38]           | n = 695<br>(target range 0–18 years)                                                       | Laboratory confirmed H1N1 Influenza | Retrospective cross sectional case review           | USA           | Patients on hospital record | Admission to hospital ward or to intensive care                                                                                                                                                          |                                                        |
| Gotta 2017 [39]            | n = 169, *(target 1 month–18 year)                                                         | Lower respiratory tract infection   | Secondary analysis of a randomised controlled trial | Switzerland   | Paediatric ED               | Antibiotic prescription at the initial contact                                                                                                                                                           |                                                        |
| Millar 2007 [40]           | n = 257 (included range 1–17 years)                                                        | Peritonsillar Abscess               | Retrospective chart review                          | Canada        | ED                          | Admission to hospital on initial presentation                                                                                                                                                            |                                                        |
| Pailhous 2015 [41]         | n = 348<br>median 18 weeks<br>(included range 0–100 weeks)<br>All <12 years                | Acute bronchiolitis                 | Prospective cohort study                            | France        | ED                          | Admission to hospital on initial presentation                                                                                                                                                            |                                                        |
| Parker 2009 [42]           | n = 312 (target range 2–23 months)<br>All <12 years                                        | Bronchiolitis                       | Secondary analysis of a prospective cohort study    | Canada        | ED                          | Major medical intervention (oxygen administration for 30 minutes or more for saturation <90% in room air, IV fluid bolus of 20ml/kg or more, treatment for apnoea, admission to the Critical Care Unit). |                                                        |
| Pruikkonen 2014 [43]       | 539, (target 6 months-16 years)                                                            | Wheeze during respiratory infection | Retrospective chart review                          | Finland       | ED                          | Hospitalisation for at least 48 hours or intensive care admission                                                                                                                                        |                                                        |

(Continued)

Table 1. (Continued)

| Study             | Population (n, mean or median age in years, IQR or SD of age in years % under 1% over 12)* | Presenting Condition              | Study design                                                                                                                 | Country | Setting                                                                         | Primary outcome                                                   | Additional Outcomes                         |
|-------------------|--------------------------------------------------------------------------------------------|-----------------------------------|------------------------------------------------------------------------------------------------------------------------------|---------|---------------------------------------------------------------------------------|-------------------------------------------------------------------|---------------------------------------------|
| Rebnord 2017 [44] | n = 401<br>mean 2.3 (median 1.6)<br>All <12 years                                          | Fever and/or respiratory symptoms | Secondary analysis of randomised controlled trial                                                                            | Norway  | Four out-of-hours general practice services and one paediatric emergency clinic | Antibiotic prescription at the initial contact                    | Hospital admission from the initial contact |
| Smith 2010 [45]   | n = 256 (target range 6 months-10 years)                                                   | Acute otitis media                | Observational cohort study                                                                                                   | UK      | Primary Care                                                                    | Antibiotic prescribed by general practitioner (timeframe unclear) |                                             |
| Voets 2006 [46]   | n = 405<br>average 9.4 months<br>All <12 years                                             | Bronchiolitis                     | Prospective cohort study                                                                                                     | Belgium | ED                                                                              | Admission to hospital on initial presentation                     |                                             |
| Yusuf 2012 [47]   | n = 325 (target range 0–2 years)<br>78.8%<br>All <12 years                                 | Bronchiolitis                     | Retrospective cohort study of all patients younger than 2 with bronchiolitis who were monitored in Texas Children's hospital | USA     | Emergency Department Observation Unit                                           | Admission to hospital from the paediatric observation unit.       |                                             |

**Grey shading** indicates studies where at least one outcome was assessed at a timepoint beyond the initial contact where symptoms were documented (eg hospitalisation within 30 days, symptom duration).

\*where data is absent from this column it is unavailable. ED = Emergency Department.

<https://doi.org/10.1371/journal.pone.0249533.t001>

95% CI 1.54–4.31), parent reported severe fever or a temperature of  $\geq 37.8^{\circ}\text{C}$  (1.99 95% CI 1.22–3.25), wheeze (2.16 95% CI 1.28–3.60), and intercostal and subcostal recession (3.82 95% CI 2.23–6.62). In this study, the baseline risk of hospitalisation within 30 days was 0.9%. Although recession was associated with the largest odds ratio for the study outcome, only 7% of patients presenting with recession were hospitalised within 30 days. We found a low risk of bias across 5/6 domains for this study, and a medium risk in the final domain (study attrition).

*Hospitalisation within 24 hours.* One study assessed 19 relevant prognostic factors in a population of 132 children aged 0–2 years presenting to ED with a subsequent diagnosis of bronchiolitis [28]. Of these three were associated with modest increases in odds of hospitalisation: increased work of breathing (3.39 95% CI 1.29–8.92  $p = 0.013$ ), dehydration (2.54 95% CI 1.34–4.82  $p = 0.004$ ), and heart rate above 97<sup>th</sup> centile for each age (3.78 95% CI 1.05–13.57  $p = 0.041$ ). For this study, we found a high risk of bias due to confounding, and a medium risk of bias due to prognostic factor measurement, and statistical analysis and reporting. Potentially confounding variables were not considered or controlled for, and some details regarding prognostic factors and their statistical significance was lacking.

*Prolonged or deteriorating symptoms.* We included three studies exploring the association between symptoms and prolonged duration or deterioration [6, 7, 29] in 2945 children consulting with a suspected RTI.

One study identified five trajectories of recovery from acute cough [29] but baseline symptoms were unable to identify the trajectory of any given child. Parent reported severe cough in the 24 hours before exam was associated more severe and longer lasting cough trajectories. We had no major concerns regarding the risk of bias for this study and found a medium risk of bias in 2/6 domains, and a low risk in 4/6. In a second study [6] of pre-school children with a



Table 2. Risk of bias assessment summary.

| Study                      | Study Participation | Study Attrition | Prognostic Factor Measurement | Outcome Measurement | Study Confounding | Statistical Analysis and reporting |
|----------------------------|---------------------|-----------------|-------------------------------|---------------------|-------------------|------------------------------------|
| Ahmed 2010 [31]            | Low                 | Low             | Low                           | Low                 | Medium            | Low                                |
| Alzaharani 2018 [32]       | Low                 | Low             | Medium                        | Low                 | Medium            | Low                                |
| Ambroggio 2018 [23]        | Low                 | Medium          | Low                           | Low                 | Medium            | Low                                |
| Bender 2009 [33]           | Low                 | Low             | Low                           | Low                 | High              | Low                                |
| Blacklock 2011 [34]        | Low                 | Medium          | Low                           | Low                 | High              | Low                                |
| Brown 2003 [35]            | Medium              | Low             | Medium                        | Low                 | High              | Low                                |
| Butler 2005 [7]            | Medium              | High            | Medium                        | Low                 | High              | Medium                             |
| Ciofi Degli Atti 2006 [36] | Medium              | Medium          | Low                           | Low                 | Medium            | Low                                |
| Dalziel 2013 [25]          | Medium              | Low             | Medium                        | Low                 | High              | Medium                             |
| Dubnov-Raz 2011 [26]       | Low                 | Low             | Low                           | Low                 | High              | Low                                |
| Florin 2020 [37]           | Medium              | High            | Medium                        | Low                 | High              | Low                                |
| Garcia 2015 [38]           | Low                 | Low             | Low                           | Low                 | Low               | Low                                |
| Gotta 2017 [39]            | Low                 | Low             | Medium                        | High                | Medium            | Low                                |
| Hay 2003 [6]               | Low                 | Medium          | Low                           | Low                 | Low               | Low                                |
| Hay 2016 [9]               | Low                 | Low             | Low                           | Low                 | Low               | Low                                |
| Millar 2007 [40]           | Low                 | Low             | Medium                        | Medium              | Medium            | Medium                             |
| Pailhouse 2015 [41]        | Low                 | Medium          | Medium                        | Low                 | High              | Medium                             |
| Parker 2009 [42]           | Medium              | Low             | Low                           | Low                 | Medium            | Low                                |
| Pruikkonen 2014 [43]       | Low                 | Low             | Medium                        | Low                 | Low               | Low                                |
| Rebnord 2017 [44]          | Medium              | High            | Low                           | Low                 | High              | Low                                |
| Smith 2010 [45]            | Medium              | High            | High                          |                     | Medium            | High                               |
| Venkatesan 2015 [27]       | High                | High            | High                          | Low                 | Low               | Low                                |
| Voets 2006 [46]            | Medium              | Low             | Low                           | Low                 | Medium            | Medium                             |
| Walsh 2004 [28]            | Low                 | Low             | Medium                        | Low                 | High              | Medium                             |
| Wensaas 2018 [29]          | Low                 | Medium          | Low                           | Low                 | Medium            | Low                                |
| Yang 2017 [30]             | Medium              | Low             | Medium                        | Low                 | High              | High                               |
| Yusuf 2012 [47]            | Low                 | Low             | Low                           | Low                 | Medium            | Low                                |

<https://doi.org/10.1371/journal.pone.0249533.t002>

cough of less than 28 days and without asthma there was no difference in cough length between patients with or without abnormal chest signs, fever, or tachypnoea. We had few concerns regarding the risk of bias for this study and found a medium risk of bias in 1/6 domains, and a low risk in 5/6.

One study [7] of 290 children consulting a site of usual care with suspected acute viral upper respiratory tract infection recorded 18 individual severity score items (CARIFS items [24]) scored by parents or carers on the day of the initial consultation and six clinician recorded symptoms. Of these, patients with parent or carer reported fever and low energy/tiredness were more likely to have a higher parent reported CARIFS score (indicating worse symptoms) after seven days. These two variables explained 15% of the variation in CARIFS score after seven days. Patients with a clinician recorded cough at the initial consultation were also more likely to have higher CARIFS score after seven days. We found a moderate risk of confounding in three domains (study participation, prognostic factor measurement, and statistical analysis and reporting) and a high risk in two (confounding and study attrition).

*Re-consultation.* We identified two studies including 240 children with suspected acute viral upper respiratory tract infection and 3016 children with community acquired pneumonia [7,

23]. In primary care, Butler et al found was no association between 18 individual severity score items (CARIFS items [24]) and six clinician identified factors recorded on the day of the initial consultation and re-consultation [7]. Patients discharged from ED with a diagnosis of community acquired pneumonia patients were more likely to re-consult if they had consulted with fever at the index visit (OR 2.24 95% CI 1.29–3.90) [23].

*Antibiotics within 14 days.* Butler et al found that none of 18 parent reported CARIFS items on the day of the initial consultation [24] or six clinician identified symptoms were associated with antibiotic prescription within 14 days in children not receiving a prescription at their initial consultation.

**Factors associated with measures of raised clinical concern.** *Hospitalisation.* 15 studies examined associations between prognostic factors and hospitalisation from the initial contact [23, 25–27, 30, 33–35, 37, 38, 40–44, 46, 47]. There was a range of different definitions of ‘hospitalisation’ (see S1 Table in S1 File). Factors with significant associations for children with unspecified RTI, influenza, bronchiolitis and other conditions are reported separately in Table 3. In general we had concerns about the risk of bias in these studies; we found several to have a high risk of bias due to confounding linked with the retrospective design of the studies (Table 2).

**Table 3. Factors associated with hospitalisation from the initial contact.**

| Setting / Clinical condition / Number of children (n =)                                                                                | Likelihood of being hospitalised (associated factors)                                                                                                                                                                                                                                                                            |                                                                                  | Discrepant findings between studies and possible explanations (in italics)                                                                                                                                                                                                                                                                                                                                                                                                                                                                                                            |
|----------------------------------------------------------------------------------------------------------------------------------------|----------------------------------------------------------------------------------------------------------------------------------------------------------------------------------------------------------------------------------------------------------------------------------------------------------------------------------|----------------------------------------------------------------------------------|---------------------------------------------------------------------------------------------------------------------------------------------------------------------------------------------------------------------------------------------------------------------------------------------------------------------------------------------------------------------------------------------------------------------------------------------------------------------------------------------------------------------------------------------------------------------------------------|
|                                                                                                                                        | Increased                                                                                                                                                                                                                                                                                                                        | Reduced                                                                          |                                                                                                                                                                                                                                                                                                                                                                                                                                                                                                                                                                                       |
| <b>Settings:</b> Primary Care [27, 44]<br>ED [25, 43]<br>Paediatric assessment unit [34]<br><b>Clinical condition:</b> RTI<br>n = 1640 | Respiratory distress on clinical examination [34]; respiratory rate as a continuous variable [44]; signs on auscultation [44] pallor [34]; temperature of $\geq 39^\circ\text{C}$ (although in the same study a threshold of $\geq 38^\circ\text{C}$ was not significant) [34]                                                   | Findings on ear examination [44]                                                 | <b>Oxygen saturation:</b> Associated with hospitalisation at two thresholds, 90–95% [44], and $< 94\%$ [34], but not at one further threshold, $< 90\%$ .<br><br><i>One study was in an acute settings [34], the other in a primary care setting [44]</i>                                                                                                                                                                                                                                                                                                                             |
| <b>Setting:</b> Emergency Department<br><br><b>Clinical condition:</b> Influenza<br>n = 2422                                           | Abnormal lung auscultation [26]; abnormal x-ray or radiologic evidence of pneumonia [26, 33]; chest wall retraction [25]; signs of dehydration [25]; oxygen saturation $< 93\%$ [25]; fatigue [38]; tachycardia [38]; laboratory confirmed influenza B [33]; respiratory distress [33]; shortness of breath or dyspnoea [26, 38] | Headache [38]<br>Congestion [38]<br><br>Chills [38]; respiratory exhaustion [27] | <b>Myalgia and Fever:</b> Associated with reduced odds of hospitalisation in one study [38] but not a second study [26]<br><br><i>There were no differences in setting or the ages of children between these studies. The study finding a significant relationship included a larger cohort.</i>                                                                                                                                                                                                                                                                                      |
| <b>Setting:</b> Emergency Department<br>Observation Unit<br><b>Clinical condition:</b> Bronchiolitis<br>n = 2201                       | Food intake of $< 50\%$ of the usual amount [41]; decreased hydration [28, 42]; respiratory rate $> 60/\text{minute}$ [41, 42]; an accessory muscle score of $\geq 6/9$ ; tachycardia above the 97 <sup>th</sup> percentile for age                                                                                              |                                                                                  | <b>Increased work of breathing:</b> Associated with increased odds of hospitalisation in one study [28] but not another [47].<br><br><b>Lower oxygen saturation:</b> Associated with an increased odds of hospitalisation at four thresholds: $< 95\%$ [46], $\leq 94\%$ [41], $< 93\%$ [47] and $\leq 92\%$ [42]. One study found no association between oxygen saturation as a continuous variable and hospitalisation [35].<br><br><i>The setting, age group, and size in these studies is similar. We found the study with no association to have a high risk of confounding.</i> |
| <b>Setting:</b> Emergency Department<br><br><b>Clinical condition:</b> Community acquired pneumonia<br>n = 477                         | CRP [37]; procalcitonin [37]<br><br>(Increased odds of hospitalisation per doubling of biomarker value)                                                                                                                                                                                                                          |                                                                                  | No discrepant findings                                                                                                                                                                                                                                                                                                                                                                                                                                                                                                                                                                |

A grey box indicates that no associations were found.

<https://doi.org/10.1371/journal.pone.0249533.t003>

**Table 4. Factors associated with an antibiotic prescription at the initial contact.**

| Setting / Clinical condition / Number of children (n =)                                                                                                                                                                                                                                                            | Likelihood of being prescribed antibiotics (associated factors) |                               | Discrepant findings between studies and possible explanations (in italics)                                                                                                                                                                   |
|--------------------------------------------------------------------------------------------------------------------------------------------------------------------------------------------------------------------------------------------------------------------------------------------------------------------|-----------------------------------------------------------------|-------------------------------|----------------------------------------------------------------------------------------------------------------------------------------------------------------------------------------------------------------------------------------------|
|                                                                                                                                                                                                                                                                                                                    | Increased                                                       | Reduced                       |                                                                                                                                                                                                                                              |
| Setting: Primary care [36, 44], ED [39], ambulatory care [32], mixed settings [31]<br><br>Clinical Condition: RTI<br>n = 12868                                                                                                                                                                                     | WBC greater or less than the reference for age [39]             | Shortness of breath [39]      | Fever                                                                                                                                                                                                                                        |
|                                                                                                                                                                                                                                                                                                                    | Pleuritic pain [39]                                             | Wheezing [39]                 | Associated with a raised relative risk of antibiotics in one study based in paediatric primary care offices [36] but not in two others (one set in ambulatory care [32], another with a mix of settings including primary care and ED [31]). |
|                                                                                                                                                                                                                                                                                                                    | Findings on ear examination [44]                                | Congestion [31]               |                                                                                                                                                                                                                                              |
|                                                                                                                                                                                                                                                                                                                    | C-reactive Protein (CRP) level [39, 44]                         | Vomiting in the last day [44] |                                                                                                                                                                                                                                              |
| One found a 10 fold increase from normal to be associated with increased odds of antibiotics [39].<br>The second study explored four thresholds: <21, 21–40, 41–60, >60. Of these, only <21 was not associated with increased odds of antibiotics [44].<br>In this study the clinicians knew the CRP test results. |                                                                 |                               |                                                                                                                                                                                                                                              |
| Setting: General Practice<br>Clinical Condition: Otitis Media<br>n = 256                                                                                                                                                                                                                                           | Ear Discharge [45]                                              |                               | No discrepant findings                                                                                                                                                                                                                       |

A grey box indicates that no associations were found.

<https://doi.org/10.1371/journal.pone.0249533.t004>

*Antibiotics.* Six studies analysed the association between symptoms, signs, and investigation and antibiotic prescription at the initial consultation. There were five studies analysing associations with antibiotic prescription at the initial contact in 12868 children consulting with a suspected respiratory tract infection [31, 32, 36, 39, 44] and one study of 256 children presenting with otitis media in routine clinical practice [45]. Significant associations are reported in Table 4.

## Discussion

### Summary of results

We found 27 studies fulfilling our inclusion criteria. Nine explored future outcomes and the remainder explored clinical management from the initial consultation. None of the studies were conducted in a home setting and only seven were in primary care.

Two studies investigated future hospitalisation [9, 28]. In one study, moderate-to-severe vomiting, parent reported severe fever or a temperature of  $\geq 37.8^{\circ}\text{C}$ , intercostal and subcostal recession, and wheeze at the initial contact with primary care were associated with low increases odds of hospitalisation within 30 days [9]. The presence of at least four of seven characteristics (the four symptoms above, in addition to age < 2 years, illness duration of <4 days, and current asthma) was associated with an 11.8% risk of hospitalisation, whilst the presence of zero or only one characteristic reduced risk of hospitalisation in 30 days to 0.3%. In this study the overall risk of hospitalisation was 0.9%. We found a low risk of bias across all but one domains in this study meaning that we consider the results to be reliable. As acknowledged by the authors, the results are most useful in identifying which children are at a low risk of hospitalisation within 30 days of presentation to primary care as 88.2% of those classified as “high risk” did not require hospitalisation.

In the second study [28], increased work of breathing, dehydration and heart rate above 97<sup>th</sup> centile for each age were associated with low increases of odds of hospitalisation within 24 hours of the initial consultation. We had concerns regarding the study procedures meaning we are unable to make firm conclusions about the relationship between the factors identified and

hospitalisation. The overall risk of hospitalisation in this study was 23.6% much higher than that in primary care and, in all probability, the home.

There was little evidence available on prognostic factors association with death. Most factors were not associated with re-consultation or prolonged symptoms. We found two reliable studies indicating that prediction of clinical course based upon symptoms is challenging. In one study, children presenting with parent or carer reported fever and low energy or tiredness, or a clinician recorded cough, were more likely to have worse parent reported symptoms after seven days [7]. No confounding variables were discussed in this study, and we had concerns about the risk of bias from study attrition. In one study, children with a diagnosis of community acquired pneumonia presenting with fever were slightly more likely to re-consult.

One study found that none of 18 CARIFs items reported by parents on the day of the initial consultation or 6 clinician recorded symptoms, signs, and investigations were associated with antibiotic prescription in a follow up period of two weeks [7].

The majority of included studies assessed symptoms, signs, and investigations associated with immediate hospitalisation. Across different settings and conditions, signs of respiratory difficulty such as shortness of breath, a low oxygen saturation, and signs of dehydration were associated with small increases in the odds of hospitalisation. The retrospective nature of this evidence prevents firm conclusions as it is unclear whether any prognostic factors were acknowledged and not recorded, or recorded and not reported.

### Comparison with the literature

The review adds to the literature investigating how undesired consequences of respiratory and other infections can be predicted in primary care. Previous reviews have focused on the predicting serious infection using clinical features at presentation [48, 49], clinical prediction rules [50], laboratory tests [49, 51], and the NICE traffic light system [52]. Much like our study, these reviews find a paucity of studies in a low prevalence, general practice settings. They also find that in low prevalence settings, symptoms and clinical prediction rules have limited rule-in value for serious infection [48–50, 52].

Our study focused on the prediction of poor prognosis. A previous review [11] found little evidence of clinical rules to predict poor prognosis in children presenting with cough and respiratory tract infections, and limited evidence of clinical signs and symptoms to predict pneumonia. Our findings are similar yet our methods are more robust, meaning we can be more confident in the lack of diagnostic rules and the challenges in identifying children at risk of poor outcomes in primary care. Relevant to clinicians, more recent research suggests prediction rules may be more useful for identifying children not requiring antibiotic prescription or referral to secondary care [9]. A recent study found no association between clinician ‘gut feeling’ and poor prognosis [53].

### Strengths and limitations

To our knowledge, this study is the first to systematically review the association between individual symptoms, signs, investigations and prognostic outcomes in children with RTI. The main strength of this review is its size and comprehensive coverage of the literature. Our search was large and we included studies with outcomes on the day of the initial contact in addition to studies with true prognostic outcomes.

However, the review is limited by the paucity and the low quality of the included studies. There was heterogeneity in study design, the included population, outcomes, and prognostic factor definition and measurement. Furthermore, the majority of included studies explored the association between symptoms, signs, and investigations and clinical decision making, but

the quality of these clinical decisions was not clear. We also limited our search to high income countries, meaning our results may not be applicable to lower and middle income countries.

Finally, we only analysed individual symptoms, signs, and investigations. We excluded studies investigating groups of symptoms unless individual factors contributing to this were reported separately. Many factors are interlinked, such as respiratory distress and low oxygen saturations, but we were unable to investigate the contribution of individual characteristics when presented as clusters.

### Implications for future research

In order to best explore the hypothesis that symptoms, signs, and clinical investigations can be of use to parents when assessing a child with a respiratory tract infection, future research should consider four design elements. Firstly research should focus on identifying factors that parents can measure to help them decide if clinical input is needed. We identified no studies aiming to identify children who do not need to see a doctor or for whom continued care at home is safe.

Secondly studies should measure symptoms in the ways parents do. Each study in this review took one cross section only to measure the presence of each prognostic factor. Although this is relevant to how clinicians may make a judgement, it may not be relevant to how parents assess illness in their child which includes assessment of change in symptoms over time and with over the counter medications.

Thirdly, studies should be set in the home in order to explore factors of greatest relevance to parents.

Finally, studies should interpret how their results may impact parental decision making. This should focus on whether changes in odds of poor outcomes are large enough that care in the home is no longer safe.

### Conclusions

We found nine studies exploring associations between symptoms, signs, and investigations and prognostic outcomes in children presenting with RTIs to primary care. Two studies provide evidence which may be used to stratify risk of future hospitalisation. One of these was conducted in primary care and we considered it to be of good quality. The other, condition in the ED, was found to be at high risk of confounding and less relevant to GPs and parents. Current evidence is insufficient to enable clinicians to identify children at risk of death, re-consultation, antibiotic prescription, or prolonged or deteriorating symptoms from examination and history at one consultation. This is due to poor quality studies, as well as very few results indicating that this is possible. There were no studies in a home setting, and no studies explicitly aiming to identify clinical features which mean it is safe to continue caring for children in the home. Research asking whether parents can identify children at risk of poor prognosis in the home is needed.

### Supporting information

**S1 File.**  
(PDF)

**S1 Checklist. PRISMA 2009 checklist.**  
(DOC)

## Acknowledgments

The authors would like to thank Nia Roberts for performing the literature searches.

## Author Contributions

**Conceptualization:** Alastair D. Hay, Stephen M. Campbell, Gail Hayward.

**Funding acquisition:** Alastair D. Hay, Stephen M. Campbell, Gail Hayward.

**Investigation:** George Edwards, Louise Newbould, Charlotte Nesbitt, Miranda Rogers, Rebecca L. Morris.

**Methodology:** George Edwards, Louise Newbould, Rebecca L. Morris, Alastair D. Hay, Stephen M. Campbell, Gail Hayward.

**Project administration:** George Edwards.

**Supervision:** Gail Hayward.

**Writing – original draft:** George Edwards.

**Writing – review & editing:** George Edwards, Louise Newbould, Charlotte Nesbitt, Miranda Rogers, Rebecca L. Morris, Alastair D. Hay, Stephen M. Campbell, Gail Hayward.

## References

1. Hobbs FDR, Bankhead C, Mukhtar T, Stevens S, Perera-Salazar R, Holt T, et al. Clinical workload in UK primary care: a retrospective analysis of 100 million consultations in England, 2007–14. *Lancet*. 2016; 387(10035):2323–30. [https://doi.org/10.1016/S0140-6736\(16\)00620-6](https://doi.org/10.1016/S0140-6736(16)00620-6) PMID: 27059888
2. Hippisley-Cox J, Vinogradova Y. Trends in consultation rates in general practice 1995/1996 to 2008/2009: analysis of the QResearch database. *London QResearch Inf Cent* . . . [Internet]. 2009;1–24. Available from: <http://www.hscic.gov.uk/catalogue/PUB01077/tren-cons-rate-gene-prac-95-09-95-08-rep.pdf>
3. Grüber C, Keil T, Kulig M, Roll S, Wahn U, Wahn V, et al. History of respiratory infections in the first 12 yr among children from a birth cohort. *Pediatr Allergy Immunol*. 2008; 19(6):505–12. <https://doi.org/10.1111/j.1399-3038.2007.00688.x> PMID: 18167154
4. Lous J, Moth G, Huibers L, Vedsted P, Christensen MB. Preschool children in Danish out-of-hours primary care: a one-year descriptive study of face-to-face consultations. 2019;1–10. <https://doi.org/10.1186/s12875-019-0922-y> PMID: 30808295
5. Hay AD, Heron J, Ness A, Team TA study. The prevalence of symptoms and consultations in pre-school children in the Avon Longitudinal Study of Parents and Children (ALSPAC): A prospective cohort study. *Fam Pract*. 2005; 22:367–74. <https://doi.org/10.1093/fampra/cmi035> PMID: 15897210
6. Hay AD, Wilson A, Fahey T, Peters TJ. The duration of acute cough in pre-school children presenting to primary care: A prospective cohort study. *Fam Pract*. 2003; 20(6):696–705. <https://doi.org/10.1093/fampra/cm9613> PMID: 14701895
7. Butler CC, Hood K, Kinnersley P, Robling M, Prout H, Houston H. Predicting the clinical course of suspected acute viral upper respiratory tract infection in children. *Fam Pract*. 2005; 22(1):92–5. <https://doi.org/10.1093/fampra/cmh713> PMID: 15640294
8. Thompson M, Vodicka TA, Blair PS, Buckley DI, Heneghan C, Hay AD. Duration of symptoms of respiratory tract infections in children: Systematic review. *BMJ* [Internet]. 2013; 347. Available from: <http://www.bmj.com/content/347/bmj.f7027> <https://doi.org/10.1136/bmj.f7027> PMID: 24335668
9. Hay AD, Redmond NM, Turnbull S, Christensen H, Thornton H, Little P, et al. Development and internal validation of a clinical rule to improve antibiotic use in children presenting to primary care with acute respiratory tract infection and cough: a prognostic cohort study. *Lancet Respir Med* [Internet]. 2016; 4(11):902–10. Available from: [https://doi.org/10.1016/S2213-2600\(16\)30223-5](https://doi.org/10.1016/S2213-2600(16)30223-5) PMID: 27594440
10. Kai J. Parents' difficulties and information needs in coping with acute illness in preschool children: a qualitative study. *BMJ* [Internet]. 1996; 313(7063):987–90. Available from: <http://www.ncbi.nlm.nih.gov/pubmed/8892421> <http://www.pubmedcentral.nih.gov/articlerender.fcgi?artid=PMC2352333> <https://doi.org/10.1136/bmj.313.7063.987> PMID: 8892421

11. Hayward G, Thompson M, Hay A. What factors influence prognosis in children with acute cough and respiratory tract infection in primary care? *BMJ*. 2012; 345(7876):1–5. <https://doi.org/10.1136/bmj.e6212> PMID: 22996938
12. Ingram J, Cabral C, Hay AD, Lucas PJ, Horwood J. Parents' information needs, self-efficacy and influences on consulting for childhood respiratory tract infections: A qualitative study. *BMC Fam Pract [Internet]*. 2013 Jul 29;14. Available from: <http://www.biomedcentral.com/content/pdf/1471-2296-14-106.pdf> PMID: 23888591
13. Cabral C, Lucas PJ, Ingram J, Hay AD, Horwood J. "It's safer to..." parent consulting and clinician antibiotic prescribing decisions for children with respiratory tract infections: AN analysis across four qualitative studies. *Soc Sci Med [Internet]*. 2015 Jun 2;136–137:156–64. Available from: <http://www.sciencedirect.com/science/article/pii/S0277953615003093>
14. Kai J. What worries parents when their preschool children are acutely ill, and why: a qualitative study. *Bmj*. 2011; 313(7063):983–6.
15. Horwood J, Cabral C, Hay AD, Ingram J. Primary care clinician antibiotic prescribing decisions in consultations for children with RTIs: A qualitative interview study. *Br J Gen Pract*. 2016; 66(644):e207–13. <https://doi.org/10.3399/bjgp16X683821> PMID: 26852795
16. Dolk FCK, Pouwels KB, Smith DRM, Robotham J V., Smieszek T. Antibiotics in primary care in England: Which antibiotics are prescribed and for which conditions? *J Antimicrob Chemother*. 2018; 73:ii2–ii10. <https://doi.org/10.1093/jac/dkx504> PMID: 29490062
17. Ashworth M, Latinovic R, Charlton J, Cox K, Rowlands G, Gulliford M. Why has antibiotic prescribing for respiratory illness declined in primary care? A longitudinal study using the General Practice Research Database. *J Public Health (Bangkok)*. 2004; 26(3):268–74. <https://doi.org/10.1093/pubmed/fdh160> PMID: 15454595
18. Smieszek T, Pouwels KB, Dolk FCK, Smith DRM, Hopkins S, Sharland M, et al. Potential for reducing inappropriate antibiotic prescribing in English primary care. *J Antimicrob Chemother*. 2018; 73:ii36–ii43. <https://doi.org/10.1093/jac/dkx500> PMID: 29490058
19. Costelloe C, Metcalfe C, Lovering A, Mant D, Hay AD. Effect of antibiotic prescribing in primary care on antimicrobial resistance in individual patients: Systematic review and meta-analysis. *BMJ*. 2010; 340(7756):1120. <https://doi.org/10.1136/bmj.c2096> PMID: 20483949
20. Andrews T, Thompson M, Buckley DI, Heneghan C, Deyo R, Redmond N, et al. Interventions to influence consulting and antibiotic use for acute respiratory tract infections in children: A systematic review and Meta-Analysis. *PLoS One*. 2012; 7(1):1–11. <https://doi.org/10.1371/journal.pone.0030334> PMID: 22299036
21. The World Bank. World Bank Country and Lending Groups [Internet]. Datahelpdesk. 2019. Available from: <https://datahelpdesk.worldbank.org/knowledgebase/articles/906519-world-bank-country-and-lending-groups>
22. Hayden JA, van der Windt DA, Cartwright JL, Co P. Research and Reporting Methods Annals of Internal Medicine Assessing Bias in Studies of Prognostic Factors. *Ann Intern Med*. 2013; 158(4):280–6. <https://doi.org/10.7326/0003-4819-158-4-201302190-00009> PMID: 23420236
23. Ambroggio L, Herman H, Fain E, Huang G, Florin T. Clinical Risk Factors for Revisits for Children With Community-Acquired Pneumonia. *Hosp Pediatr*. 2018; 8(11):718–23. <https://doi.org/10.1542/hpeds.2018-0014> PMID: 30352815
24. Jacobs B, Young NL, Dick PT, Ipp MM, Dutkowski R, Davies HD, et al. Canadian Acute Respiratory Illness and Flu Scale (CARIFS: Development of a valid measure for childhood respiratory infections. *J Clin Epidemiol*. 2000; 53(8):793–9. [https://doi.org/10.1016/s0895-4356\(99\)00238-3](https://doi.org/10.1016/s0895-4356(99)00238-3) PMID: 10942861
25. Dalziel SR, Thompson JMD, Macias CG, Fernandes RM, Johnson DW, Waisman Y, et al. Predictors of severe H1N1 infection in children presenting within Pediatric Emergency Research Networks (PERN): Retrospective case-control study. *BMJ*. 2013; <https://doi.org/10.1136/bmj.f4836> PMID: 23940290
26. Dubnov-Raz G, Somech R, Warschawski Y, Eisenberg G, Bujanover Y. Clinical characteristics of children with 2009 pandemic H1N1 influenza virus infections. *Pediatr Int*. 2011; 53(4):426–30. <https://doi.org/10.1111/j.1442-200X.2010.03271.x> PMID: 21040194
27. Venkatesan S, Myles PR, McCann G, Kousoulis AA, Hashmi M, Belatri R, et al. Development of processes allowing near real-time refinement and validation of triage tools during the early stage of an outbreak in readiness for surge: The FLU-CATS study. *Health Technol Assess (Rockv)*. 2015; 19(89):1–132. <https://doi.org/10.3310/hta19890> PMID: 26514069
28. Walsh P, Rothenberg SJ, O'Doherty S, Hoey H, Healy R. A validated clinical model to predict the need for admission and length of stay in children with acute bronchiolitis. *Eur J Emerg Med*. 2004; 11(5):265–72. <https://doi.org/10.1097/00063110-200410000-00005> PMID: 15359199

29. Wensaas KA, Heron J, Redmond N, Turnbull S, Christensen H, Thornton H, et al. Post-consultation illness trajectories in children with acute cough and respiratory tract infection: Prospective cohort study. *Fam Pract*. 2018; 35(6):676–83. <https://doi.org/10.1093/fampra/cmy021> PMID: 29897430
30. Yang WC, Lee J, Chen CY, Chang YJ, Wu HP. Westley score and clinical factors in predicting the outcome of croup in the pediatric emergency department. *Pediatr Pulmonol*. 2017; 52(10):1329–34. <https://doi.org/10.1002/ppul.23738> PMID: 28556543
31. Ahmed MN, Muyot MM, Begum S, Smith P, Little C, Windemuller FJ. Antibiotic prescription pattern for viral respiratory illness in emergency room and ambulatory care settings. *Clin Pediatr (Phila)*. 2010; 49(6):542–7. <https://doi.org/10.1177/0009922809357786> PMID: 20075029
32. Alzahrani MS, Maneno MK, Daftary MN, Wingate L, Ettienne EB. Factors Associated with Prescribing Broad-Spectrum Antibiotics for Children with Upper Respiratory Tract Infections in Ambulatory Care Settings. *Clin Med Insights Pediatr*. 2018; 12:117955651878430. <https://doi.org/10.1177/1179556518784300> PMID: 30046262
33. Bender JM, Ampofo K, Gesteland P, Stoddard GJ, Nelson D, Byington CL, et al. Development and validation of a risk score for predicting hospitalization in children with influenza virus infection. *Pediatr Emerg Care*. 2009; 25(6):369–75. <https://doi.org/10.1097/PEC.0b013e3181a792a9> PMID: 19458562
34. Blacklock C, Mayon-White R, Coad N, Thompson M. Which symptoms and clinical features correctly identify serious respiratory infection in children attending a paediatric assessment unit? *Arch Dis Child*. 2011; 96(8):708–14. <https://doi.org/10.1136/adc.2010.206243> PMID: 21586436
35. Brown L, Reiley DG, Jeng A, Green SM. Bronchiolitis: Can objective criteria predict eligibility for brief hospitalization? *Can J Emerg Med*. 2003; 5(4):239–44. <https://doi.org/10.1017/s1481803500008423> PMID: 17472765
36. Ciofi Degli Atti ML, Massari M, Bella A, Boccia D, Filia A, Salmaso S, et al. Clinical, social and relational determinants of paediatric ambulatory drug prescriptions due to respiratory tract infections in Italy. *Eur J Clin Pharmacol*. 2006; 62(12):1055–64. <https://doi.org/10.1007/s00228-006-0198-8> PMID: 17021889
37. Florin TA, Ambroggio L, Brokamp C, Brokamp C, Zhang Y, Zhang Y, et al. Biomarkers and disease severity in children with community-acquired pneumonia. *Pediatrics*. 2020; 145(6). <https://doi.org/10.1542/peds.2019-3728> PMID: 32404432
38. Garcia MN, Philpott DC, Murray KO, Ontiveros A, Revell PA, Chandramohan L, et al. Clinical predictors of disease severity during the 2009–2010 A(H1N1) influenza virus pandemic in a paediatric population. *Epidemiol Infect*. 2015; 143(14):2939–49. <https://doi.org/10.1017/S0950268815000114> PMID: 25640583
39. Gotta V, Baumann P, Ritz N, Fuchs A, Baer G, Bonhoeffer JM, et al. Drivers of antibiotic prescribing in children and adolescents with febrile lower respiratory tract infections. *PLoS One*. 2017; 12(9). <https://doi.org/10.1371/journal.pone.0185197> PMID: 28957358
40. Millar KR, Johnson DW, Drummond D, Kellner JD. Suspected peritonsillar abscess in children. *Pediatr Emerg Care*. 2007; 23(7):431–8. <https://doi.org/10.1097/01.pec.0000280525.44515.72> PMID: 17666922
41. Pailhous S, Bresson V, Loundou A, Gras-Le-Guen C, Marguet C, Chabrol B, et al. Bronchiolite aiguë du nourrisson: Enquête nationale dans les services d'accueil des urgences pédiatriques. *Arch Pediatr*. 2015; 22(4):373–9. <https://doi.org/10.1016/j.arcped.2014.12.014> PMID: 25727472
42. Parker MJ, Allen U, Stephens D, Lalani A, Schuh S. Predictors of major intervention in infants with bronchiolitis. *Pediatr Pulmonol*. 2009; 44(4):358–63. <https://doi.org/10.1002/ppul.21010> PMID: 19283838
43. Pruikkonen H, Uhari M, Dunder T, Pokka T, Renko M. Initial oxygen saturation values can predict the need to hospitalise children with mild wheezing. *Acta Paediatr Int J Paediatr*. 2014; 103(9):951–6. <https://doi.org/10.1111/apa.12688> PMID: 24825436
44. Rebnord, Ingrid K, Sandvik H, Mjelli AB, Hunskar S. Factors predicting antibiotic prescription and referral to hospital for children with respiratory symptoms: secondary analysis of a randomised controlled study at out-of-hours services in primary care. *BMJ Open* [Internet]. 2017 Jan 19; 7(e012992). Available from: <http://bmjopen.bmj.com/content/7/1/e012992> <https://doi.org/10.1136/bmjopen-2016-012992> PMID: 28096254
45. Smith L, Ewings P, Smith C, Thompson M, Harnden A, Mant D. Ear discharge in children presenting with acute otitis media: Observational study from UK general practice. *Br J Gen Pract*. 2010; 60(571):101–5. <https://doi.org/10.3399/bjgp10X483148> PMID: 20132703
46. Voets S, Van Berlaer G, Hachimi-Idrissi S. Clinical predictors of the severity of bronchiolitis. *Eur J Emerg Med*. 2006; 13(3):134–8. <https://doi.org/10.1097/01.mej.0000206194.85072.33> PMID: 16679876
47. Yusuf S, Caviness AC, Adekunle-Ojo AO. Risk factors for admission in children with bronchiolitis from pediatric emergency department observation unit. *Pediatr Emerg Care*. 2012; 28(11):1132–5. <https://doi.org/10.1097/PEC.0b013e31827132ff> PMID: 23114233



48. Van den Bruel A, Haj-Hassan T, Thompson M, Mont D. Diagnostic value of clinical features at presentation to identify serious infection in children in developed countries: a systematic review. *Lancet* [Internet]. 2010; 375:834–45. Available from: [https://www.thelancet.com/journals/lancet/article/PIIS0140-6736\(09\)62000-6/fulltext](https://www.thelancet.com/journals/lancet/article/PIIS0140-6736(09)62000-6/fulltext) PMID: 20132979
49. Thompson M, van den Bruel A, Verbakel J, Lakhanpaul M, Haj-Hassan T, Stevens R, et al. Systematic review and validation of prediction rules for identifying children with serious infections in emergency departments and urgent-access primary care. *Health Technol Assess (Rockv)*. 2012; 16(15):1–99. <https://doi.org/10.3310/hta16150> PMID: 22452986
50. Verbakel JY, Van den Bruel A, Thompson M, Stevens R, Aertgeerts B, Oostenbrink R, et al. How well do clinical prediction rules perform in identifying serious infections in acutely ill children across an international network of ambulatory care datasets? *BMC Med*. 2013; 11(1). <https://doi.org/10.1186/1741-7015-11-10> PMID: 23320738
51. Van Den Bruel A, Thompson MJ, Haj-Hassan T, Stevens R, Moll H, Lakhanpaul M, et al. Diagnostic value of laboratory tests in identifying serious infections in febrile children: Systematic review. *Bmj* [Internet]. 2011; 342(7810). Available from: <https://www.bmj.com/content/342/bmj.d3082> <https://doi.org/10.1136/bmj.d3082> PMID: 21653621
52. Kerkhof E, Lakhanpaul M, Ray S, Verbakel JY, Van Den Bruel A, Thompson M, et al. The predictive value of the NICE “red traffic lights” in acutely ill children. *PLoS One*. 2014; 9(3).
53. Turnbull S, Lucas PJ, Redmond NM, Christensen H, Thornton H, Cabral C, et al. What gives rise to clinician gut feeling, its influence on management decisions and its prognostic value for children with RTI in primary care: A prospective cohort study. *BMC Fam Pract*. 2018; 19(1). <https://doi.org/10.1186/s12875-018-0716-7> PMID: 29402235
